# Supplementary material for: Efficient coupling of MnO2/TiN on carbon cloth positive electrode and Fe2O3/TiN on carbon cloth negative electrode for flexible ultra-fast hybrid supercapacitors
Source: Royal Society of Chemistry journal article supplement (doi:10.1039/d1ra05742a), 2021-01-01
Supplement: d1ra05742a1.pdf [file d1ra05742a1.pdf]

## Supporting Information

### Efficient coupling of the MnO<sub>2</sub>/TiN on carbon cloth positive electrode and Fe<sub>2</sub>O<sub>3</sub>/TiN on carbon cloth negative electrode for flexible ultra-fast hybrid supercapacitors

Mai Li<sup>1\*</sup>, Zheyi Meng<sup>2\*</sup>, Kailan Zhu<sup>1</sup>, Ruihua Hu<sup>1</sup>, Jiale Wang<sup>1</sup>, Chunrui Wang<sup>1</sup>, Paul K. Chu<sup>2</sup>

<sup>1</sup> College of Science, Donghua University, Shanghai 201620, China

<sup>2</sup> State Key Laboratory for Modification of Chemical Fibers and Polymer Materials, College of Material Science, Donghua University, Shanghai 201620, China

<sup>3</sup> Department of Physics, Department of Materials Science and Engineering, and Department of Biomedical Engineering, City University of Hong Kong, Tat Chee Avenue, Kowloon, Hong Kong, China.

\* Corresponding author: E-mail: [limai@dhu.edu.cn](mailto:limai@dhu.edu.cn) (M. Li); [mengzheyi@dhu.edu.cn](mailto:mengzheyi@dhu.edu.cn)

(Z.Y. Meng)

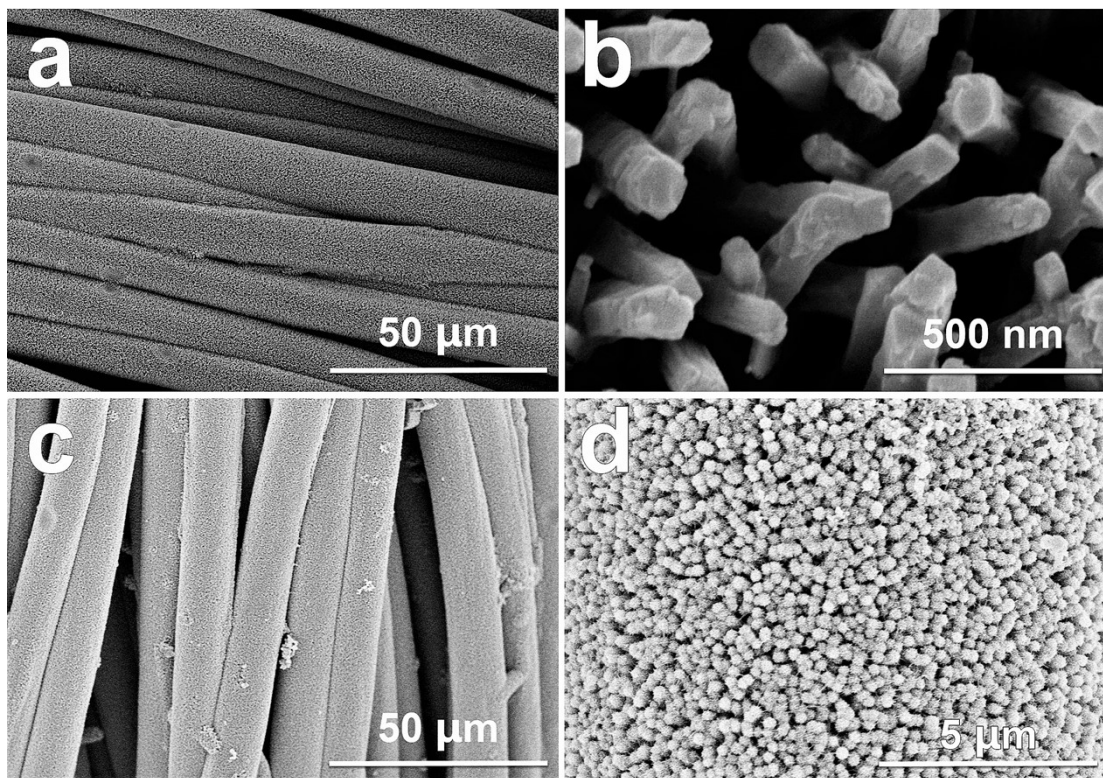

**Fig. S1** SEM images: (a, b) TiN/CC and (c, d) MnO<sub>2</sub>/TiN/CC at different magnifications

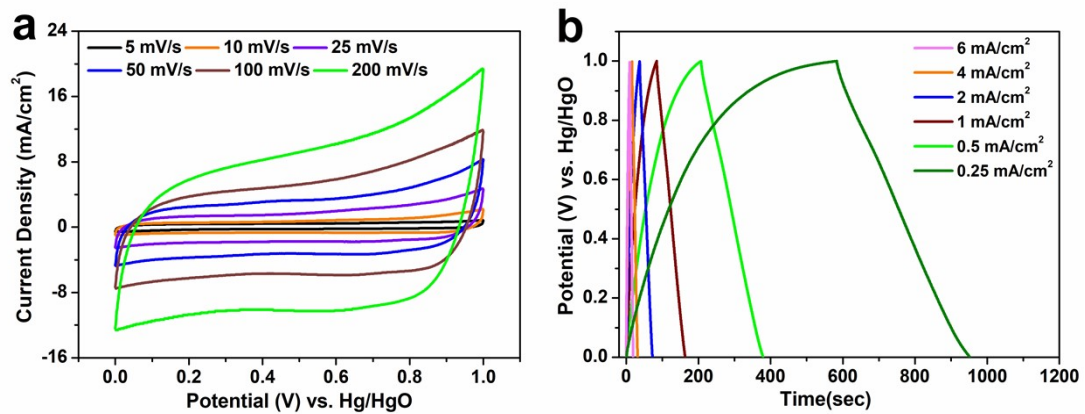

**Fig. S2.** Electrochemical characterization of MnO<sub>2</sub>/CC: (a) CV curves acquired at different scanning rates and (b) GCD curves obtained at different current densities.

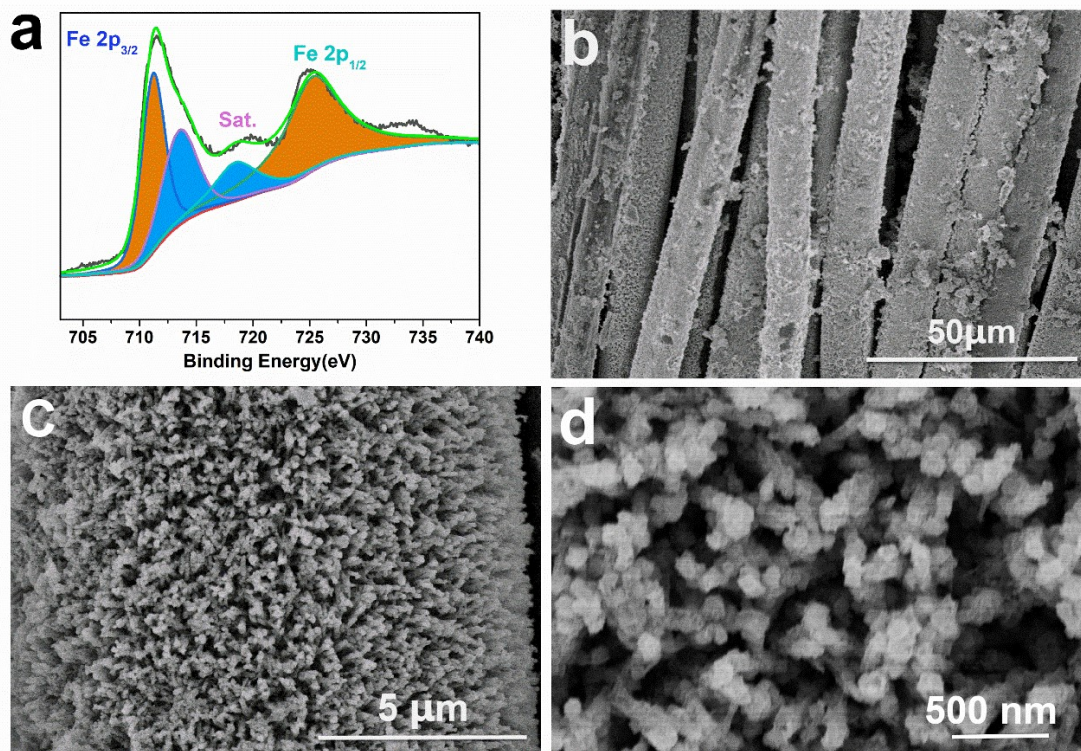

**Fig. S3.** (a) XPS Fe 2p spectrum of Fe<sub>2</sub>O<sub>3</sub>@TiN/CC; (b)-(d) SEM images of Fe<sub>2</sub>O<sub>3</sub>/TiN/CC at different magnifications.

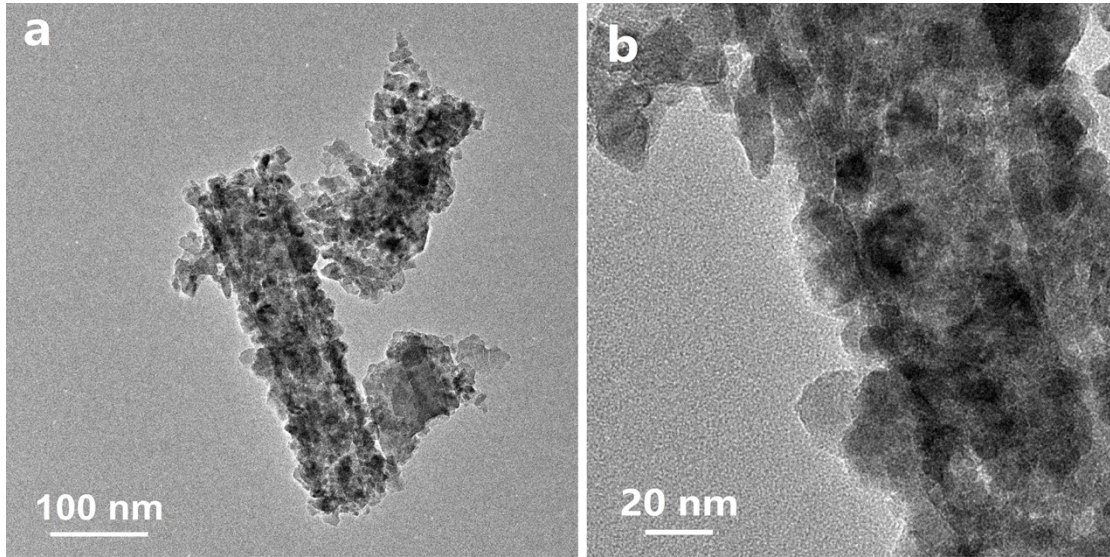

**Fig. S4** (a-b) TEM images of the  $\text{Fe}_2\text{O}_3/\text{TiN}$  core-shell structure at different magnifications

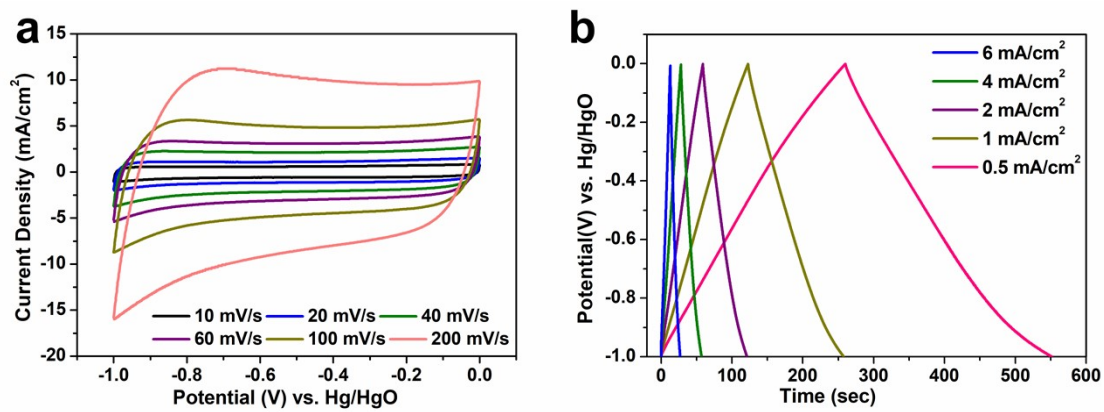

**Fig. S5.** Electrochemical characterization of TiN/CC: (a) CV curves obtained at different scanning rates and (b) GCD curves acquired at different current densities.

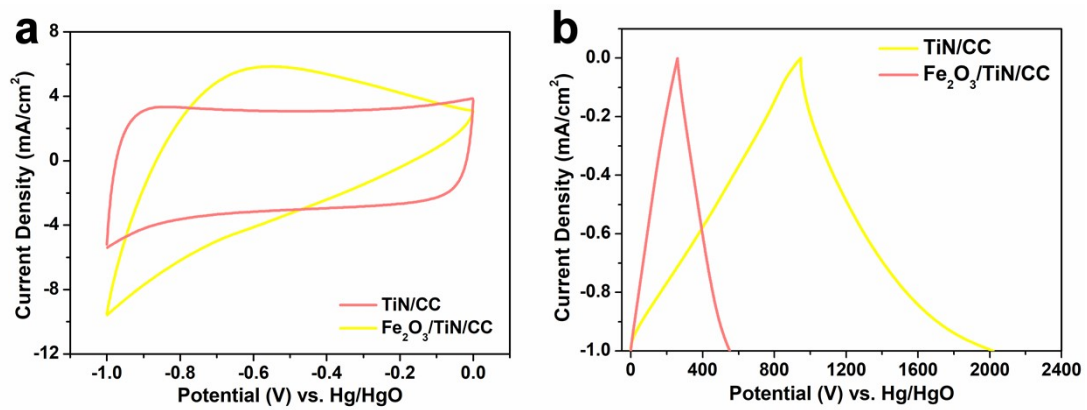

**Fig. S6** (a) CV characteristics of TiN/CC and Fe<sub>2</sub>O<sub>3</sub>/TiN/CC at a scanning rate of 60 mV/s and (b) GCD characteristics of TiN/CC and Fe<sub>2</sub>O<sub>3</sub>/TiN/CC at a current density of 0.5 mA/cm<sup>2</sup>.
